# Supplementary material
Source: ML conference proceedings conference paper supplement (https://openaccess.thecvf.com/content/CVPR2026/html/An_Bezier_Degradation_Modeling_CVPR_2026_paper.html)
Supplement: Supplementary file 1 [file An_Bezier_Degradation_Modeling_CVPR_2026_supplemental.pdf]

# Bézier Degradation Modeling for LiDAR-based Human Motion Capture

## Supplementary Material

### A. Method Details

**Detailed Procedure for TAD** We provide the detailed procedure for Trajectory-Aware Bézier Degradation (TAD) in Algorithm 1. Given the finest cubic Bézier chain for joint  $k$ , i.e.,  $\{\mathbf{J}_t^{(k)}\}_{t=0}^T$  with control points  $\mathbf{C}_{t,1}^{(k)}, \mathbf{C}_{t,2}^{(k)}$ , and a step size  $s$ , we first resample the timestamps  $\mathcal{T}_s$  from 0 to  $T$  with step size  $s$ . The new joint positions  $\tilde{\mathbf{J}}_i^{(k)}$  are set as the original joint positions at the resampled timestamps. We then extract the tangents  $\tilde{\mathbf{d}}_i^{(k)}$  at each new joint position. For each segment between two consecutive resampled timestamps, we sample  $m$  points along the segment. If  $s < 4$ , we upsample the points using the Bézier function to avoid degenerate cases; otherwise, we directly use the keypoints from the finest curve. We then compute the Bernstein basis polynomials and set up a linear system to solve for the new control point offsets  $\ell_{i,2}$  and  $\ell_{i+1,1}$ . Finally, we update the control points accordingly and return the updated Bézier chain.

This ensures that the Bézier chain constructed for each  $s$  is as similar as possible to the original curve. When refining the curve at the next level, only minor adjustments are required.

**Block-wise Causal Mask in TMT.** For the block-wise causal mask implementation of the TMT, we follow [1, 2]. Assume that the TMT receives a concatenated token sequence:

$$\mathbf{Z} = [\mathbf{F}_{\mathcal{P}}; \mathbf{E}_1; \mathbf{E}_2; \dots; \mathbf{E}_L] \in \mathbb{R}^{N \times D},$$

where  $\mathbf{F}_{\mathcal{P}}$  denotes the LiDAR feature tokens, and  $\mathbf{E}_l \in \mathbb{R}^{M_{s_l} \times D}$  denotes the motion tokens at level  $l$ . Let the index ranges of these segments be denoted by

$$\mathcal{I}_0, \mathcal{I}_1, \dots, \mathcal{I}_L, \quad \bigcup_{l=0}^L \mathcal{I}_l = \{1, \dots, N\}, \quad \mathcal{I}_i \cap \mathcal{I}_j = \emptyset.$$

We construct a binary attention mask  $\mathbf{A} \in \{0, -\infty\}^{N \times N}$  applied before the softmax operation. The mask enforces that tokens at level  $l$  may attend only to LiDAR tokens and all coarser motion levels:

$$\mathbf{A}_{i,j} = \begin{cases} 0, & \text{if } j \in \mathcal{I}_0 \cup \mathcal{I}_1 \cup \dots \cup \mathcal{I}_{l_i}, \\ -\infty, & \text{otherwise,} \end{cases}$$

where  $l_i$  denotes the level index of token  $i$ , i.e., the unique  $l$  such that  $i \in \mathcal{I}_l$  (with  $\mathcal{I}_0$  corresponding to  $\mathbf{F}_{\mathcal{P}}$ ). Thus, finer-level tokens are prevented from attending to tokens belonging to the same or finer levels, while LiDAR tokens remain fully visible to all levels.

---

### Algorithm 1 Trajectory-Aware Bézier Degradation

---

**Require:** Finest cubic Bézier chain for joint  $k$ :  $\{\mathbf{J}_t^{(k)}\}_{t=0}^T$   
with controls  $\mathbf{C}_{t,1}^{(k)}, \mathbf{C}_{t,2}^{(k)}$ ; step size  $s$

**Ensure:** Updated chain  $\{\tilde{\mathbf{J}}_i^{(k)}, \tilde{\mathbf{C}}_{i,1}^{(k)}, \tilde{\mathbf{C}}_{i,2}^{(k)}\}$

- 1: Resample  $\mathcal{T}_s \leftarrow \{t_0=0, \dots, t_{M-1}=T\}$ .
- 2: Set  $\tilde{\mathbf{J}}_i^{(k)} \leftarrow \mathbf{J}_{t_i}^{(k)}$ .
- 3: Extract tangents  $\tilde{\mathbf{d}}_i^{(k)}$  at each  $\tilde{\mathbf{J}}_i^{(k)}$ .
- 4: **for** each  $t_i \in \mathcal{T}_s$  **do**
- 5:    $m \leftarrow \max(4, s)$
- 6:    $\mathbf{t} \leftarrow \text{linspace}(0, 1, m)$
- 7:   **if**  $s < 4$  **then**                    $\triangleright$  Upsample to avoid degenerate
- 8:      $\tilde{\mathbf{X}} \leftarrow \text{Bezier}(\{\mathbf{J}_t^{(k)}, \mathbf{C}_{t,1}^{(k)}, \mathbf{C}_{t,2}^{(k)}\}_{t=t_i, t_{i+1}}, \mathbf{t})$
- 9:   **else**                                $\triangleright$  Use keypoints from finest curve
- 10:     $\tilde{\mathbf{X}} \leftarrow \{\mathbf{J}_t^{(k)}\}_{t=t_i}^{t_{i+1}}$
- 11:   **end if**
- 12:    $\mathbf{b}_0 = (1 - \mathbf{t})^3, \mathbf{b}_1 = 3(1 - \mathbf{t})^2 \mathbf{t}$
- 13:    $\mathbf{b}_2 = 3(1 - \mathbf{t}) \mathbf{t}^2, \mathbf{b}_3 = \mathbf{t}^3$
- 14:    $\mathbf{B} \leftarrow (\mathbf{b}_0 + \mathbf{b}_1) \odot \tilde{\mathbf{J}}_i^{(k)} + (\mathbf{b}_2 + \mathbf{b}_3) \odot \tilde{\mathbf{J}}_{i+1}^{(k)}$
- 15:    $\mathbf{q} \leftarrow \text{vec}(\tilde{\mathbf{X}} - \mathbf{B})$                     $\triangleright$  reshape to  $(3m)$
- 16:    $\mathbf{X} \leftarrow [\mathbf{b}_1 \odot \tilde{\mathbf{d}}_i^{(k)} - \mathbf{b}_2 \odot \tilde{\mathbf{d}}_{i+1}^{(k)}]$   $\triangleright$  reshape to  $(3m, 2)$
- 17:    $[\ell_{i,2}, \ell_{i+1,1}]^\top \leftarrow (\mathbf{X}^\top \mathbf{X} + \varepsilon \mathbf{I}_2)^{-1} \mathbf{X}^\top \mathbf{q}$
- 18:    $\tilde{\mathbf{C}}_{i+1,1}^{(k)} \leftarrow \tilde{\mathbf{J}}_{i+1}^{(k)} - \ell_{i+1,1} \tilde{\mathbf{d}}_{i+1}^{(k)}$
- 19:    $\tilde{\mathbf{C}}_{i,2}^{(k)} \leftarrow \tilde{\mathbf{J}}_i^{(k)} + \ell_{i,2} \tilde{\mathbf{d}}_i^{(k)}$
- 20: **end for**
- 21: **return**  $\{\tilde{\mathbf{J}}_i^{(k)}, \tilde{\mathbf{C}}_{i,1}^{(k)}, \tilde{\mathbf{C}}_{i,2}^{(k)}\}$

---

During self-attention, the masked attention logits are computed as

$$\text{Attn}(\mathbf{Q}, \mathbf{K}, \mathbf{V}) = \text{softmax}\left(\frac{\mathbf{Q}\mathbf{K}^\top}{\sqrt{D}} + \mathbf{A}\right)\mathbf{V}.$$

This block-wise causal masking ensures a strict information hierarchy, where coarse-level motion provides global trends, and finer levels progressively refine the motion trajectories under guidance from both LiDAR observations and previously reconstructed scales.

We provide a comparison with other forms of masks in Sec.B.

### B. Additional Experiments

In this section, we provide additional experimental results, including more ablation experiments on some components and a further exploration of the generalizability of our method.

Table 5. Action-wise 3D pose estimation errors on Human3.6M. We report the MPJPE (mm) for each action category.

| Method              | Dire.       | Disc.       | Eat         | Greet       | Phone       | Photo       | Pose        | Purch.      | Sit         | SitD        | Smoke       | Wait        | WalkD       | Walk        | WalkT       | Avg                         |
|---------------------|-------------|-------------|-------------|-------------|-------------|-------------|-------------|-------------|-------------|-------------|-------------|-------------|-------------|-------------|-------------|-----------------------------|
| MotionBERT [3]      | 36.3        | 38.7        | 38.6        | 33.6        | 42.1        | 50.1        | 36.2        | 35.7        | 50.1        | 56.6        | 41.3        | 37.4        | 37.7        | 25.6        | 26.5        | 39.2                        |
| Bezire              | 34.7        | 36.8        | 37.3        | 31.6        | 38.7        | 45.5        | 36.0        | 33.7        | 47.3        | 52.7        | 38.4        | 36.6        | 24.1        | 34.6        | 24.8        | 36.9 <sub>1,2,3</sub>       |
| <b>Bezire + TAD</b> | <b>34.5</b> | <b>36.9</b> | <b>37.3</b> | <b>31.5</b> | <b>38.6</b> | <b>45.6</b> | <b>36.2</b> | <b>33.4</b> | <b>47.3</b> | <b>52.5</b> | <b>38.5</b> | <b>36.4</b> | <b>24.0</b> | <b>34.5</b> | <b>24.6</b> | <b>36.8<sub>1,2,4</sub></b> |

Table 6. Cross-dataset generalization performance of BMLiCap. To ensure compatibility between datasets, we use only a subset of the 32-frame time window for each test dataset, so the results differ slightly from the full test.

(a) FreeMotion ↔ NoiseMotion

| Train       | FreeMotion |       |      | NoiseMotion |       |      |
|-------------|------------|-------|------|-------------|-------|------|
|             | MPJPE      | MPVPE | AE   | MPJPE       | MPVPE | AE   |
| FreeMotion  | 45.9       | 56.7  | 22.2 | 137.0       | 177.8 | 43.1 |
| NoiseMotion | 80.1       | 98.5  | 29.4 | 37.1        | 47.3  | 23.8 |

(b) LiDARHuman26M ↔ SLOPER4D

| Train     | LiDARHuman26M |       |      | SLOPER4D |       |      |
|-----------|---------------|-------|------|----------|-------|------|
|           | MPJPE         | MPVPE | AE   | MPJPE    | MPVPE | AE   |
| LiDARH26M | 67.9          | 87.2  | 28.3 | 173.1    | 207.2 | 34.3 |
| SLOPER4D  | 189.7         | 240.2 | 48.5 | 36.2     | 43.2  | 20.6 |

Table 7. Ablation study of attention masking strategies in TMT.

| Mode                     | MPJPE       | MPVPE       | AE          |
|--------------------------|-------------|-------------|-------------|
| Global                   | 70.9        | 90.1        | 28.8        |
| (a) Diag                 | 68.1        | 87.0        | 29.1        |
| (b) Level Independent    | 67.6        | 86.1        | 29.0        |
| (c) Sliding Window       | 68.2        | 87.1        | 29.3        |
| <b>Block-wise Causal</b> | <b>66.8</b> | <b>85.4</b> | <b>28.8</b> |

**Ablation on Attention Masking Strategies.** To investigate which information flows are important, we compare it with several common mask structures. We make the following modifications to the masking strategy: (a) add unidirectional temporal constraints; (b) remove dependencies between levels but keep visibility to point clouds; (c) use a sliding window to introduce asymmetric bidirectional interactions between levels. The results are shown in Tab.7. The gains of the block-wise causal mask indicate that enforcing stage-wise temporal ordering and restricting information flow across levels provides a more effective inductive bias for reconstructing coherent motion.

**Cross-Dataset Generalization.** The cross-dataset experiments evaluate the generalization ability of BMLiCap by training the model on one dataset and directly testing it on the other three without any fine-tuning. As shown in Tab.6, overall, the results show that BMLiCap remains reasonably robust under domain shift, while cross-dataset generalization still poses a challenging setting.

**Other Input Modalities.** To evaluate the generalizability of our method, we also implement BMLiCap on the commonly used RGB modality. As shown in Tab. 5, based on MotionBERT [3], we implement a long-sequence motion predictor using the configuration  $\mathcal{S} = \{40, 81, 243\}$ . Our method delivers consistent performance improvements.

**Efficiency Analysis.** We compare the efficiency of BMLiCap with SOTA methods in Fig. 10a, plotting MPJPE and AE against model FLOPs, with bubble size proportional to parameter count. BMLiCap achieves a better accuracy-

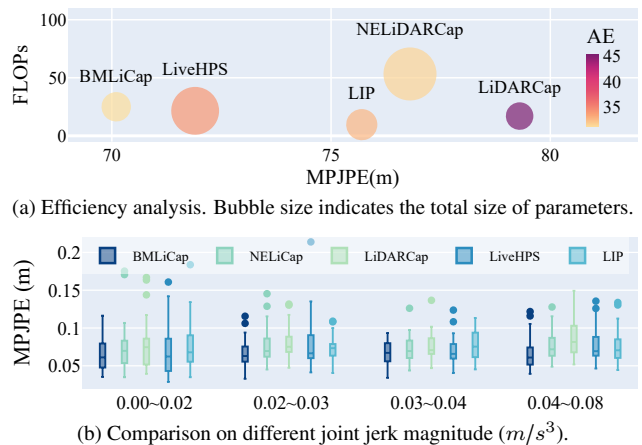

Figure 10. Efficiency and error distribution analysis of BMLiCap.

efficiency trade-off: AE decreases substantially with only a modest increase in FLOPs and parameters, demonstrating the benefit of multi-scale Bézier modeling.

**Motion Complexity Analysis.** To assess robustness under varying motion dynamics, we bin test sequences by their average joint jerk magnitude ( $m/s^3$ ) and report MPJPE for each bin in Fig. 10b. Joint jerk—the third derivative of position—directly reflects the abruptness of motion, making it a natural indicator of reconstruction difficulty. As jerk increases, all methods exhibit higher errors; however, BMLiCap degrades more gracefully than competing approaches. This advantage is attributed to the multi-scale Bézier representation, which explicitly models smooth trajectory priors at coarse levels and reserves fine-level capacity for rapid local deformations, thereby maintaining accuracy even for highly dynamic sequences.

### C. Additional Visualization

In this section, we demonstrate more sequential results of our method under complex actions in Fig.11. High-resolution details are visible when the figure is magnified.

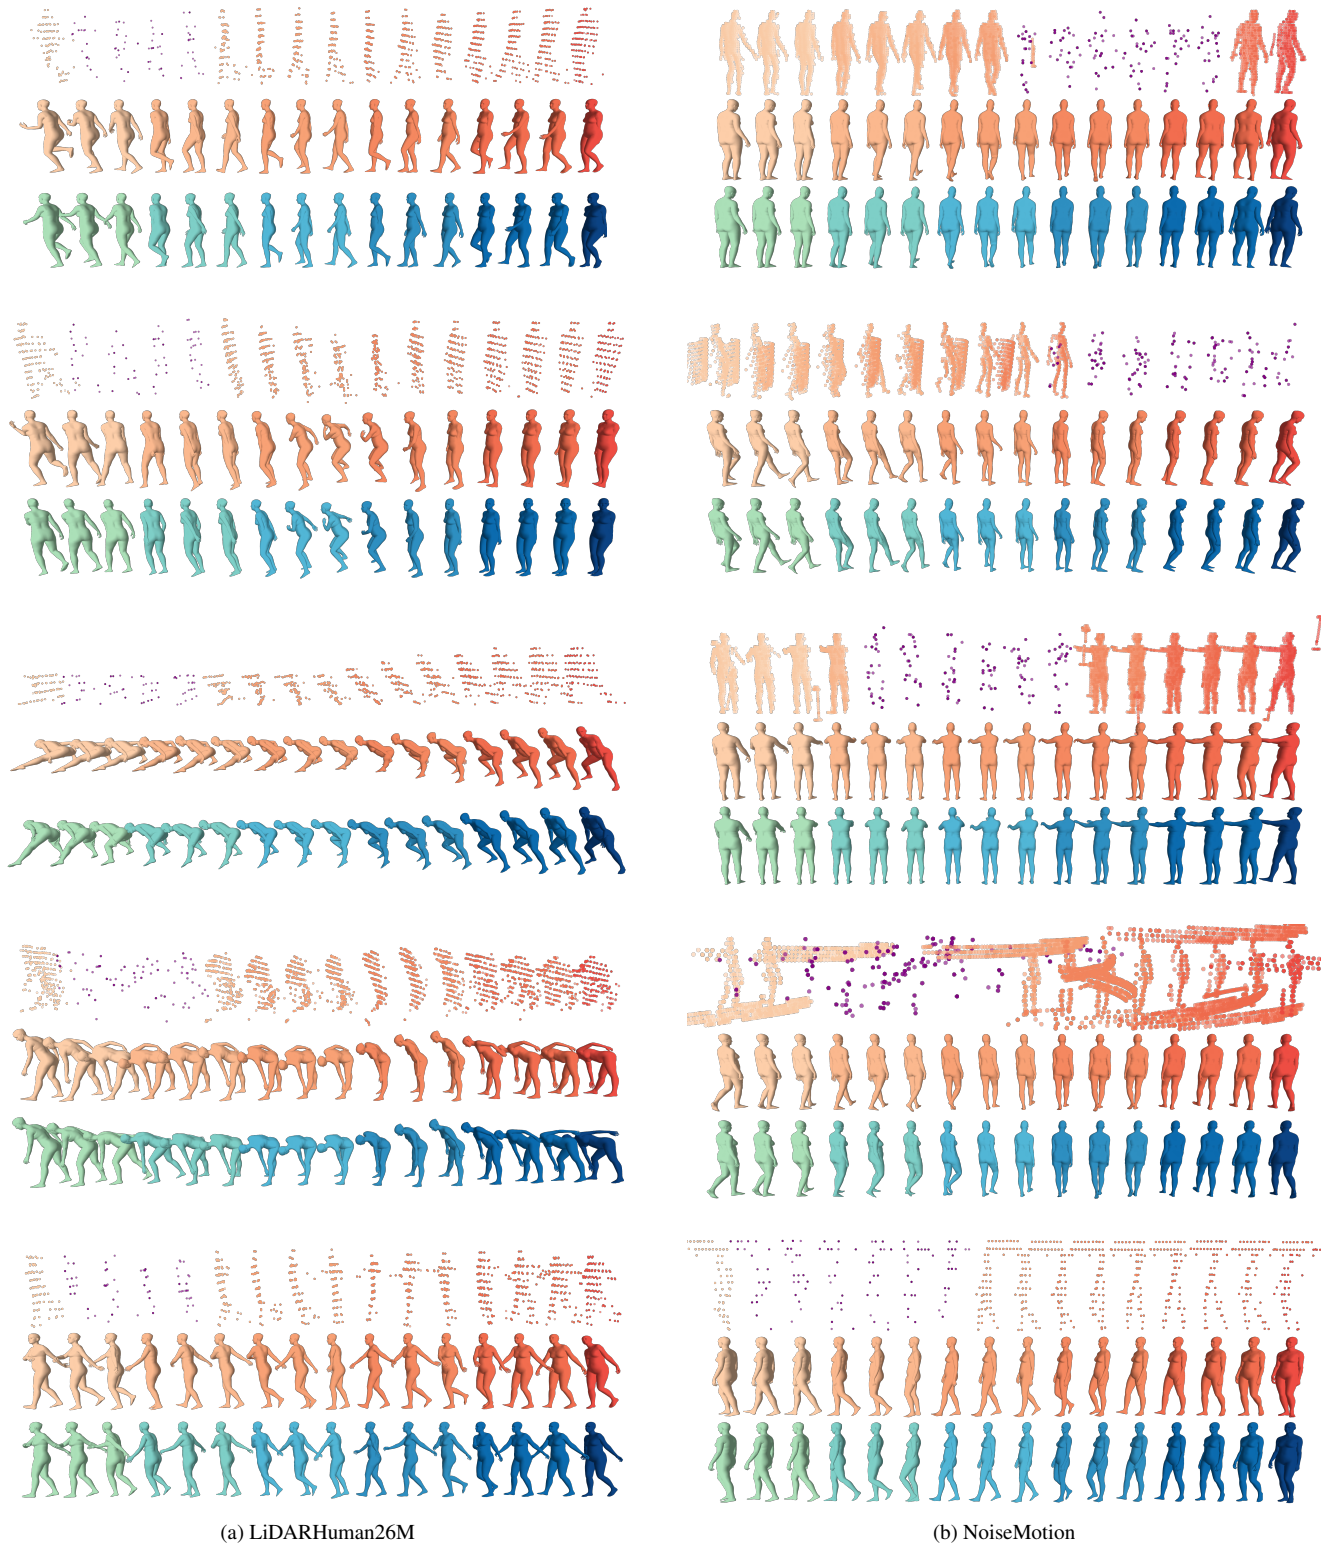

Figure 11. Randomly selected visualization results of motion sequences from two datasets. For each group, first row: input point clouds with manually incorporated occlusion; second row: ground-truth motion; third row: our reconstructed motion.

## References

- [1] Zhefei Gong, Pengxiang Ding, Shangke Lyu, Siteng Huang, Mingyang Sun, Wei Zhao, Zhaoxin Fan, and Donglin Wang. CARP: Visuomotor Policy Learning via Coarse-to-Fine Autoregressive Prediction, 2025. [0](#)
- [2] Keyu Tian, Yi Jiang, Zehuan Yuan, Bingyue Peng, and Liwei Wang. Visual autoregressive modeling: Scalable image generation via next-scale prediction. *Adv. Neural Inf. Process. Syst.*, 37:84839–84865, 2024. [0](#)
- [3] Wentao Zhu, Xiaoxuan Ma, Zhaoyang Liu, Libin Liu, Wayne Wu, and Yizhou Wang. MotionBERT: A Unified Perspective on Learning Human Motion Representations. In *ICCV*, pages 15085–15099, 2023. [1](#)
